# Supplementary material for: Manuscript – School Toilet Facilities Perception of Children with Hirschsprung Disease: A parents perspective
Source: Research Square preprint supplement (doi:10.21203/rs.3.rs-7906386/v1), 2025-11-07
Supplement: Supplementary file 1 [file b97295d60814bbdbfc6105a4.docx]

# Manuscript – School Toilet Facilities Perception of Children with Hirschsprung Disease: A parents perspective

A.C. ter Schure, MD1,2,3,S.P. van Streun, MD1,2,3, C.M.C. de Beaufort, MD PhD1,2,3, J. van Leeuwen1, M. van Dorp, MSc5, S. van Velsen-Knobbout, MSc5, J. Bols5, M.A. Benninga, MD, PhD4, J.P.M. Derikx MD, PhD1, 2, 3, R.R. Gorter MD PhD1,2,3

1. Department of Pediatric Surgery, Emma Children’s Hospital Amsterdam UMC, Location University of Amsterdam, Meibergdreef 9, 1105 AZ Amsterdam, The Netherlands

2. Amsterdam Gastroenterology and Metabolism Research Institute, 1105 AZ Amsterdam, The Netherlands

3. Amsterdam Reproduction and Development Research Institute, 1105 AZ Amsterdam, The Netherlands

4. Amsterdam UMC location University of Amsterdam, Department of Pediatric Gastroenterology and Nutrition, Meibergdreef 9, Amsterdam, The Netherlands.

5. Vereniging ziekte van Hirschsprung, 5231 DD ’s-Hertogenbosch, the Netherlands

*Corresponding author:*

Anne C. ter Schure (AS), [a.c.terschure@amsterdamumc.nl](mailto:a.c.terschure@amsterdamumc.nl), +31640816998a.c.terschure@amsterdamumc.nl, Department of pediatric surgery, Amsterdam Pediatric Abdominal Center, Emma Children’s Hospital, Amsterdam University Medical Centers, Meibergdreef 9, 1105 AZ, Amsterdam, The Netherlands

# Supplementary material 1 – Survey parents perception of school toilet facilities

**School Project – Introduction**

**1.1** Are you a parent/guardian or a child?

- Parent/Guardian
- Child

**1.2** Which condition applies to you/your child?

- Hirschsprung’s disease
- Anorectal malformation

**1.1.1** *If ‘Are you a parent/guardian or a child?’ is equal to ‘Parent/Guardian’, answer this question:*
As a parent and/or legal representative of a child with Hirschsprung’s disease or an anorectal malformation, do you agree that by completing this questionnaire the data will be used anonymously and untraceably for scientific research and publication?
*(Exclude participant if the answer is ‘No’ with the message: “Thank you for completing this questionnaire!”)*

- Yes
- No

**1.1.1.1** *If ‘Do you agree…’ is equal to ‘Yes’, answer this question:*
In which province do you live?

- Friesland
- Groningen
- Drenthe
- Overijssel
- Utrecht
- Flevoland
- North Holland
- South Holland
- Zeeland
- Brabant
- Gelderland
- Limburg

**1.1.2** *If ‘Are you a parent/guardian or a child?’ is equal to ‘Child’, answer this question:*
Do you agree that by completing this questionnaire the data will be used anonymously and untraceably for scientific research and publication?
*(Exclude participant if the answer is ‘No’ with the message: “Thank you for completing this questionnaire!”)*

- Yes
- No

**1.1.2.1** *If ‘Do you agree…’ is equal to ‘Yes’, answer this question:*
In which province do you live?

- Friesland
- Groningen
- Drenthe
- Overijssel
- Utrecht
- Flevoland
- North Holland
- South Holland
- Zeeland
- Brabant
- Gelderland
- Limburg

**1.1.1.2** *If ‘Do you agree…’ is equal to ‘Yes’, answer this question:*
Which category does your child fall into?

- Daycare (0–4 years)
- Primary school / special education (4–12 years)
- Secondary school / special education (12–18 years)

**Schoolproject – Primary School**

Number Question Answers

**2.1** If *“In which category does your child fall?”* is equal to *“Primary school / special education (ages 4–12)”*, answer this question:
**How old is your child?** Please provide in years.

**2.2** If *“In which category does your child fall?”* is equal to *“Primary school / special education (ages 4–12)”*, answer this question:
**How many schools did you visit before making your final choice?**

- 0
- 1
- 2
- 3
- 4
- 5 or more

**2.3** If *“In which category does your child fall?”* is equal to *“Primary school / special education (ages 4–12)”*, answer this question:
**During your search, were there schools that set requirements regarding your child’s continence (urine and stool)?**

- Yes
- No

**2.4** If *“In which category does your child fall?”* is equal to *“Primary school / special education (ages 4–12)”*, answer this question:
**Did you experience difficulties enrolling your child in a primary school?**

- Yes
- No

**2.4.1** If *“Did you experience difficulties enrolling your child in a primary school?”* is equal to *“Yes”*, answer this question:
**What difficulties did you encounter?**

**2.5 What is the best description of your child’s school size?**

- <100 children
- 100–500 children
- 500 children

**2.6 What is the location of your child’s school?**

- Village
- City
- Other

**3.7 Has your child had negative experiences related to urination or defecation at their current school?**

- Yes
- No

**3.7.1** If *“Yes”*: **What negative experiences has your child had?**

**3.8 Has your child had positive experiences related to urination or defecation at their current school?**

- Yes
- No

**3.8.1** If *“Yes”*: **What positive experiences has your child had?**

**3.9 How would you describe the toilet facilities at your child’s current school?**

**3.10 How many toilets are available for your child at school?**

**3.11 Are these toilets generally clean?**

- Yes
- No

**3.12 Are these toilets spacious and easily accessible?**

- Yes
- No

**3.13 Are the toilet cubicles open or closed?**

- Open
- Closed

**3.14 Are there possibilities to clean the toilet (e.g., with a brush or cleaning wipes)?**

- Yes
- No

**3.15 Are there possibilities for your child to clean themselves?**

- Yes
- No

**3.16 Is there a different toilet at school that your child is allowed to use besides the general children’s toilets?**

- Yes
- No

**3.16.1** If *“Yes”*: **Does your child use this toilet?**

- Yes
- No

**3.16.2** If *“Yes”*: **What type of toilet is this?**

- Disability toilet
- Teacher’s toilet
- Visitor’s toilet
- Other (please specify)

**3.16.3 Is this toilet generally clean?**

- Yes
- No

**3.16.4 Is this toilet spacious and easily accessible?**

- Yes
- No

**3.16.5 Is the cubicle of this toilet open or closed?**

- Open
- Closed

**3.17 Does your child use the toilet at school?**

- Yes
- No

**3.17.1** If *“Yes”*: **Is this for urination, defecation, or both?**

- Only urination
- Only defecation
- Both

**3.17.2** If *“No”*: **What is the reason your child does not use the toilet at school?**

**3.18 Are there rules about toilet use at your child’s school (e.g., using a chain or rubber duck as a pass)?**

- Yes
- No

**3.19 Have specific agreements been made regarding your child’s toilet use at school?**

- Yes
- No

**3.19.1** If *“Yes”*: **Were these agreements already in place at the school?**

- Yes
- No

**3.19.2 Did the school request these agreements?**

- Yes
- No

**3.19.3 How were these agreements established?**

**3.20 Are there specific facilities at school for your child’s toilet use?**

- Yes
- No

**3.20.1** If *“Yes”*: **Were these facilities already present at school?**

- Yes
- No

**3.20.2 Did the school request these facilities?**

- Yes
- No

**3.20.3 How were these facilities established?**

**3.21 Does your child receive assistance at school?**

- Yes
- No

**3.21.1** If *“Yes”*: **What kind of assistance does your child receive?**

**3.21.2** If *“Yes”*: **Who provides this assistance?**

**3.22 Has your child changed primary schools?**

- Yes
- No

**3.22.1** If *“Yes”*: **Why did your child change schools?**

**3.22.2 How many times has your child changed schools?**

**3.23 Does your child attend after-school care (BSO)?**

- Yes
- No

*(The same set of questions about toilet experiences, facilities, rules, agreements, and assistance is repeated for after-school care, mirroring those for the primary school.)*

**3.24 Do you have any additional comments, suggestions, feedback, or questions about this topic? For example, regarding possibilities for cleaning the toilet.**

# Supplementary Material 2 – Comments on negative and positive parental experiences

| **Theme** | **Negative comments** | **Positive comments** |
| --- | --- | --- |
| **Information/education** | Teacher had difficulties with it. | Eventually fully potty trained around the 4th birthday. Understanding and encouragement to become continent. |
| **Personal / Medical Assistance** | Our son had to be able to clean himself in case of accidents. | New situation for the school, nurse joined. |
| Negative = 12, Positive = 16 | Question of how we would solve it when he needed to be cleaned. Who would do it. | Appropriate for his situation, not a regular child. |
|  | If he had an accident despite his illness, we had to come to school to clean him. | Enough opportunities offered to go independently to the toilet. |
|  | Child was welcome, but school was not prepared to help in case of accidents. External help/parents needed. | Allowed to use other toilets and teacher guided him. |
|  | As parents we had to fight hard for support with cleaning/toileting, three meetings were needed. | Wet pants not seen as a big issue. |
|  | Teased by other children because of long toilet visits. | Teachers willing to help. |
|  | My son comes home almost daily with dirty underwear. He cannot wipe himself properly, and there is no extra support staff for this. | Things went very well. |
|  | Other children said the toilet smelled after our son used it. | In group 1 and 2 supported by after-school care assistant. |
|  | During kindergarten he cried on the toilet without anyone there to help after an accident. | Tried to do as much as possible independently. |
|  | Continued too long with diapers. | Supportive teacher, allowed to go home in between. |
|  | Big schools and busy schools did not have extra time/budget for additional support. | Help available. |
|  | Unexpected that the school was unwilling to help in case of accidents. Support had to be arranged through a personal budget. | Assistance with toileting and separate toilet. |
|  | Our son had to be able to clean himself in case of accidents. | Positive support. |
|  |  | Did not have to defecate during school time. |
|  |  | Improved with age, teacher provided help when needed. |
|  |  | Daughter accompanied daily to disabled toilet at gym for 20 minutes until group 4. |
| Overarching theme: | No ability of teacher to assist with cleaning, due to lacking time and budget | Assistance (especially during first years) by school nurse, teacher, assistant teacher, and positive coaching for independence. |
| **Medical Character** | He does not want to defecate at school. | Urinates at school without problem, defecates at home at fixed times. |
| Negative = 4, Positive = 5 | Afraid it would smell, take too long, make too much noise → stomach cramps. | Urination goes well. |
|  | First six weeks he did not use the toilet. | Eventually became continent at school. |
|  | Urination possible, but not defecation. | Few/no complaints currently. |
|  | Daily bowel irrigation on parents’ request. | Independent. |
|  |  | My son no longer experiences problems from his illness. |
|  |  | Urinates at school without problem, defecates at home at fixed times. |
| Overarching theme: | Child does not want to have defecation at school, causing stomach ache | Early continence/ potty trained. |
| **Rules from School** | No understanding of incontinence, insisted child had to be potty trained. | Exemption to always use toilet. |
| Negative = 3, Positive = 8 | School refused to admit him. | Always allowed to go. |
|  | Not allowed to use toilet during lessons/exams. | May go without asking. |
|  |  | Teachers explained she should always be able to go. |
|  |  | Parents requested → always allowed with time. |
|  |  | Rules in place. |
|  |  | Exemption to always use toilet. |
|  |  | Always allowed to go. |
| Overarchting theme: | School acceptance unless potty trained, and rules concerning specific timing of toilet use | Possibility to go to the bathroom when needed |
| **Possibilities** | Parents had to initiate support themselves. | Teachers cooperative, child allowed to use staff toilet. |
| Negative = 4, Positive = 14 | Every year had to discuss toilet permission again. | Free toilet access. |
|  | Had to ask explicitly. | Allowed to use staff toilets. |
|  | Parents provided support materials themselves. | Reward system for continence. |
|  | During application, made clear that child could not wait → no exceptions. | Agreements made, help with cleaning. |
|  |  | Very supportive school, allowed signals like blowing bubbles when successful. |
|  |  | Discussions with teachers/parents. |
|  |  | Open communication with teachers. |
|  |  | School aware of situation, child allowed to go when needed. |
|  |  | Parents included in multidisciplinary discussions. |
|  |  | Guidance through special education consultant. |
|  |  | Close contact with teachers ensured toilet access. |
|  |  | Teachers cooperative, child allowed to use staff toilet. |
|  |  | Free toilet access. |
|  |  | Allowed to use staff toilets. |
|  |  | Reward system for continence. |
| Overarchting theme: | Parents must request necessary adjustments and are expected to procure any additional materials. | Potty training reward system such as contince. |
| **Facilities** | No toilet paper. | Access to a separate toilet. |
| Negative = 13, Positive = 4 | Dirty toilets. | Well arranged, another separate toilet. |
|  | No closed stalls for young children. | Fully adapted school. |
|  | Changing had to be done on open toilet floor. | Suggestions: closed toilets, brushes, soap, private area, rename “disabled toilet” to reduce stigma. |
|  | Toilets open at top and bottom → lack of privacy. |  |
|  | Doors could be opened from outside. |  |
|  | Toilets dirty. |  |
|  | Special toilet too far away. |  |
|  | General facilities: small, open, cramped, no seat, insufficient equipment. |  |
|  | No toilet paper. |  |
|  | Dirty toilets. |  |
|  | No closed stalls for young children. |  |
|  | Changing had to be done on open toilet floor. |  |
| Overarchting theme: | Cleanliness, not spacious, no toilet paper, no ability to close, small doors, no special toilets. | Special toilet for privacy and cleaning when needed. |
|  |  |  |
| **Description of toilet** | Reasonable, but not always clean. | Separate spacious toilets with partitions. |
| Negative = 11, Positive = 6 | Too few, only one per class. | Enough toilets and time to go. |
|  | Present but dirty. | Separate room for care and toilet. |
|  | Two toilets for 20 children, no separate one possible. | Adequate separate facilities per group. |
|  | Child toilets cannot be locked. | Child-height toilets, easy for urination. |
|  | Limited availability, not always clean/private. | Access to staff toilets. |
|  | Not clean, low doors. | Generally clean and good. |
|  | Adapted toilet far away. |  |
|  | Reasonable, but not always clean. |  |
|  | Too few, only one per class. |  |
|  | Present but dirty. |  |
|  |  |  |
